# Supplementary material
Source: publisher site journal article supplement (https://www.dovepress.com/get_supplementary_file.php?f=445369.docx)
Supplement: Supplementary file 1 [file get_supplementary_file.php]

**Supplementary material**

**Table S1.** Use of inhalers, antitussives, and mucolytics in the study population

|  | Total (N = 623) | PRISm (n = 40) | COPD (n = 583) | P-value |
| --- | --- | --- | --- | --- |
| Inhaler |  |  |  |  |
| Users, n (%) | 581 (93.3) | 40 (100) | 541 (92.8) | 0.079 |
| MPR | 0.63 ± 0.36 | 0.49 ± 0.36 | 0.64 ± 0.35 | 0.017 |
| LAMA |  |  |  |  |
| Users, n (%) | 171 (27.4) | 10 (25.0) | 161 (27.6) | 0.720 |
| MPR | 0.07 ± 0.18 | 0.09 ± 0.22 | 0.07 ± 0.18 | 0.824 |
| LABA |  |  |  |  |
| Users, n (%) | 38 (6.1) | 6 (15.0) | 32 (5.5) | 0.015 |
| MPR | 0.01 ± 0.08 | 0.02 ± 0.09 | 0.01 ± 0.08 | 0.017 |
| LABA/LAMA |  |  |  |  |
| Users, n (%) | 347 (55.7) | 26 (65.0) | 321 (55.1) | 0.221 |
| MPR | 0.24 ± 0.32 | 0.14 ± 0.20 | 0.25 ± 0.33 | 0.488 |
| ICS/LABA |  |  |  |  |
| Users, n (%) | 94 (15.1) | 0 (0) | 94 (16.1) | 0.004 |
| MPR | 0.04 ± 0.13 | 0.00 ± 0.00 | 0.04 ± 0.14 | 0.007 |
| ICS/LAMA |  |  |  |  |
| Users, n (%) | 158 (25.4) | 19 (47.5) | 139 (23.8) | 0.001 |
| MPR | 0.09 ± 0.22 | 0.19 ± 0.29 | 0.08 ± 0.21 | 0.001 |
| ICS/LAMA/LABA |  |  |  |  |
| Users, n (%) | 237 (38.0) | 12 (30.0) | 225 (38.6) | 0.279 |
| MPR | 0.17 ± 0.30 | 0.05 ± 0.11 | 0.18 ± 0.31 | 0.074 |
| Antitussives, n (%) | 45 (7.2) | 4 (10.0) | 41 (7.0) | 0.483 |
| Mucolytics, n (%) | 248 (39.8) | 19 (47.5) | 229 (39.3) | 0.305 |

ICS = inhaled corticosteroid; LABA = long-acting β2-agonist; LAMA = long-acting muscarinic antagonist; MPR = medication possession ratio

**Table S2.** Baseline characteristics of the study participants with smoking history

|  | PRISm (n = 26) | COPD (n = 508) | P-value |
| --- | --- | --- | --- |
| Age, years | 61.2 ± 9.8 | 66.4 ± 9.1 | 0.011 |
| Male sex | 24 (92.3) | 491 (96.7) | 0.244 |
| Body mass index, kg/m2 | 22.7 ± 4.7 | 22.3 ± 3.4 | 0.360 |
| Smoking status |  |  | 0.450 |
| Ex-smoker | 12 (46.2) | 273 (53.7) |  |
| Current smoker | 14 (53.8) | 235 (46.3) |  |
| Smoking intensity, pack years | 36.7 ± 27.1 | 42.4 ± 23.7 | 0.130 |
| Charlson Comorbidity Index | 1.08 ± 0.98 | 1.56 ± 1.05 | 0.013 |
| Diabetes mellitus | 4 (15.4) | 68 (13.4) | 0.771 |
| Heart failure | 0 (0) | 9 (1.8) | 0.494 |
| Chronic liver disease | 1 (3.8) | 27 (5.3) | 0.743 |
| Chronic kidney disease | 2 (7.7) | 15 (3.0) | 0.180 |
| History of pulmonary tuberculosis | 13 (50.0) | 122 (24.0) | 0.003 |
| History of NTM lung disease | 0 (0) | 6 (1.2) | 0.578 |
| Physician-diagnosed asthma | 8 (30.8) | 124 (24.4) | 0.464 |
| Baseline lung function* |  |  |  |
| FEV1, L | 1.73 ± 0.35 | 1.70 ± 0.56 | 0.703 |
| FEV1, %predicted | 66.4 ± 10.5 | 66.5 ± 19.0 | 0.818 |
| FVC, L | 2.24 ± 0.47 | 3.27 ± 0.77 | <0.001 |
| FVC, %predicted | 61.2 ± 11.0 | 89.6 ± 17.7 | <0.001 |
| FEV1/FVC, % | 77.6 ± 7.3 | 51.4 ± 11.6 | <0.001 |
| FEF25–75%, %predicted | 58.5 ± 23.2 | 27.9 ± 11.6 | <0.001 |
| DLCO, mL/mmHg/min | 13.0 ± 3.3 | 13.5 ± 4.3 | 0.346 |
| DLCO, %predicted | 74.9 ± 12.5 | 81.1 ± 21.2 | 0.097 |
| Positive bronchodilator response | 1 (3.8) | 68 (13.4) | 0.158 |
| Laboratory findings |  |  |  |
| Blood neutrophil-to-lymphocyte ratio | 3.17 ± 2.51 | 3.57 ± 3.55 | 0.640 |
| Blood eosinophil count, × 103/L | 263.3 ± 261.7 | 224.8 ± 234.0 | 0.636 |
| Serum protein, g/dL | 6.99 ± 0.56 | 6.83 ± 0.57 | 0.255 |
| Serum albumin, g/dL | 3.94 ± 0.49 | 3.98 ± 0.37 | 0.957 |
| Baseline CT findings |  |  |  |
| Emphysema | 10 (38.5) | 406 (79.9) | <0.001 |
| Tuberculous-destroyed lung | 2 (7.7) | 41 (8.1) | 0.945 |
| Bronchiectasis | 15 (57.7) | 226 (44.5) | 0.187 |
| Interstitial lung abnormalities | 12 (46.2) | 173 (34.1) | 0.206 |
| Interstitial lung disease | 3 (11.5) | 13 (2.6) | 0.009 |

Data are presented as *n* (%) or mean ± standard deviation.

*FEV1, FVC, and FEF25–75% are post-bronchodilator values.

CT = computed tomography; DLCO = diffusing capacity of the lungs for carbon monoxide; FEF25–75% = forced expiratory flow between 25% and 75% of vital capacity; FEV1 = forced expiratory volume in 1 s; FVC = forced vital capacity; NTM = nontuberculous mycobacteria

**Table S3.** Risk of acute exacerbation in PRISm patients and COPD GOLD spirometric stage subgroups

|  | Moderate | | Severe | | Moderate-to-severe | |
| --- | --- | --- | --- | --- | --- | --- |
|  | β ± SE | *P*-value | β ± SE | *P*-value | β ± SE | *P*-value |
| PRISm vs. COPD | 0.07 ± 0.11 | 0.541 | −0.19 ± 0.10 | 0.071 | −0.12 ± 0.17 | 0.467 |
| PRISm vs. COPD GOLD stage 1 | 0.18 ± 0.15 | 0.237 | 0.01 ± 0.06 | 0.935 | 0.18 ± 0.18 | 0.298 |
| PRISm vs. COPD GOLD stage 2 | 0.07 ± 0.11 | 0.529 | −0.10 ± 0.08 | 0.202 | −0.03 ± 0.16 | 0.846 |
| PRISm vs. COPD GOLD stage 3 | 0.13 ± 0.17 | 0.458 | −0.27 ± 0.26 | 0.228 | −0.14 ± 0.30 | 0.640 |
| PRISm vs. COPD GOLD stage 4 | 0.08 ± 0.20 | 0.670 | −0.62 ± 0.20 | 0.003 | −0.53 ± 0.32 | 0.099 |

The analyses were adjusted for age, sex, smoking intensity, Charlson Comorbidity Index, FVC, DLCO, serum protein, interstitial lung abnormalities, and inhaler medication possession ratio.

**Table S4.** Annual changes of lung function in PRISm patients and COPD GOLD spirometric stage subgroups

|  | No. patients  (N = 623) | Univariable | | Multivariable* | |
| --- | --- | --- | --- | --- | --- |
|  | β ± SE | P-value | β ± SE | P-value |
| ΔFEV1, mL/y |  |  | <0.001 |  | <0.001 |
| PRISm | 40 | −1.41 ± 2.99 |  | −2.80 ± 2.83 |  |
| COPD GOLD stage 1 | 155 | −46.6 ± 5.99 |  | −50.1 ± 5.72 |  |
| COPD GOLD stage 2 | 309 | −24.9 ± 2.98 |  | −27.0 ± 3.00 |  |
| COPD GOLD stage 3 | 96 | −4.94 ± 5.45 |  | −3.56 ± 5.35 |  |
| COPD GOLD stage 4 | 23 | 9.37 ± 12.2 |  | 5.40 ± 12.2 |  |
| ΔFVC, mL/y |  |  | <0.001 |  | <0.001 |
| PRISm | 40 | −8.73 ± 4.21 |  | −10.5 ± 4.03 |  |
| COPD GOLD stage 1 | 155 | −50.1 ± 7.65 |  | −50.1 ± 7.38 |  |
| COPD GOLD stage 2 | 309 | −34.5 ± 4.92 |  | −31.7 ± 4.88 |  |
| COPD GOLD stage 3 | 96 | −23.8 ± 11.9 |  | −15.3 ± 11.5 |  |
| COPD GOLD stage 4 | 23 | 2.14 ± 21.9 |  | -8.46 ± 22.6 |  |
| ΔFEV1/FVC |  |  | <0.001 |  | <0.001 |
| PRISm | 40 | 0.24 ± 0.07 |  | 0.26 ± 0.07 |  |
| COPD GOLD stage 1 | 155 | −0.41 ± 0.11 |  | −0.41 ± 0.11 |  |
| COPD GOLD stage 2 | 309 | −0.24 ± 0.08 |  | −0.32 ± 0.08 |  |
| COPD GOLD stage 3 | 96 | −0.01 ± 0.15 |  | −0.09 ± 0.15 |  |
| COPD GOLD stage 4 | 23 | 0.16 ± 0.22 |  | 0.15 ± 0.23 |  |
| ΔDLCO, mL/mmHg/min/y |  |  | <0.001 |  | <0.001 |
| PRISm | 40 | −0.01 ± 0.04 |  | −0.00 ± 0.04 |  |
| COPD GOLD stage 1 | 155 | −0.41 ± 0.06 |  | −0.38 ± 0.05 |  |
| COPD GOLD stage 2 | 309 | −0.23 ± 0.04 |  | −0.23 ± 0.04 |  |
| COPD GOLD stage 3 | 96 | −0.19 ± 0.07 |  | −0.18 ± 0.07 |  |
| COPD GOLD stage 4 | 23 | −0.02 ± 0.11 |  | −0.06 ± 0.11 |  |

*Adjusted by age, sex, height, smoking intensity, baseline lung function (FEV1, FVC, or DLCO), and inhaler medication possession ratio.

**Table S5.** Baseline characteristics of patients with PRISm according to the longitudinal changes

|  | Persistent  PRISm  (n = 16) | PRISm to  normal (n = 11) | Incident  COPD (n = 13) | P-value |
| --- | --- | --- | --- | --- |
| Age, years | 61.9 ± 9.1 | 64.5 ± 9.4 | 58.3 ± 15.1 | 0.470 |
| Male sex | 14 (87.5) | 8 (72.7) | 7 (53.8) | 0.137 |
| Body mass index, kg/m2 | 21.8 ± 5.0 | 23.0 ± 3.6 | 23.5 ± 2.5 | 0.705 |
| Smoking status |  |  |  | 0.020 |
| Never-smoker | 3 (18.8) | 3 (27.3) | 8 (61.5) |  |
| Ex-smoker | 6 (37.5) | 2 (18.2) | 4 (30.8) |  |
| Current smoker | 7 (43.8) | 6 (54.5) | 1 (7.7) |  |
| Smoking intensity, pack years | 34.6 ± 36.0 | 23.6 ± 19.0 | 10.8 ± 16.9 | 0.050 |
| Charlson Comorbidity Index | 1.13 ± 0.96 | 0.36 ± 0.67 | 1.15 ± 1.99 | 0.108 |
| Diabetes mellitus | 2 (12.5) | 0 (0) | 2 (15.4) | 0.426 |
| Heart failure | 0 (0) | 0 (0) | 1 (7.7) | 0.354 |
| Chronic liver disease | 0 (0) | 1 (9.1) | 0 (0) | 0.268 |
| Chronic kidney disease | 1 (6.3) | 0 (0) | 1 (7.7) | 0.667 |
| History of pulmonary tuberculosis | 10 (62.5) | 7 (63.6) | 4 (30.8) | 0.169 |
| History of NTM lung disease | 0 (0) | 0 (0) | 1 (7.7) | 0.354 |
| Physician-diagnosed asthma | 6 (37.5) | 4 (36.4) | 6 (46.2) | 0.861 |
| Baseline lung function* |  |  |  |  |
| FEV1, L | 1.58 ± 0.37 | 1.67 ± 0.43 | 1.62 ± 0.48 | 0.763 |
| FEV1, %predicted | 61.4 ± 11.8 | 73.2 ± 5.9 | 65.6± 13.6 | 0.010 |
| FVC, L | 1.98 ± 0.43 | 2.21 ± 0.65 | 2.19 ± 0.61 | 0.277 |
| FVC, %predicted | 55.0 ± 10.5 | 67.9 ± 10.8 | 64.3 ± 14.0 | 0.014 |
| FEV1/FVC, % | 79.9 ± 7.5 | 76.9 ± 9.1 | 73.6 ± 3.1 | 0.053 |
| FEF25–75%, %predicted | 58.6 ± 23.6 | 55.1 ± 29.7 | 40.5 ± 18.5 | 0.190 |
| DLCO, mL/mmHg/min | 12.2 ± 3.2 | 12.3 ± 2.1 | 14.7 ± 4.1 | 0.140 |
| DLCO, %predicted | 72.5 ± 13.8 | 74.9 ± 10.6 | 79.8 ± 13.9 | 0.265 |
| Positive bronchodilator response | 1 (6.3) | 0 (0) | 0 (0) | 0.472 |
| Laboratory findings |  |  |  |  |
| Blood neutrophil-to-lymphocyte ratio | 3.13 ± 3.2 | 3.14 ± 2.16 | 3.54 ± 3.08 | 0.892 |
| Blood eosinophil count, × 103/L | 194.3 ± 102.2 | 191.6 ± 220.8 | 271.9 ± 319.4 | 0.731 |
| Serum protein, g/dL | 7.06 ± 0.66 | 6.76 ± 0.68 | 7.22 ± 0.48 | 0.157 |
| Serum albumin, g/dL | 4.0 ± 0.37 | 3.76 ± 0.60 | 4.12 ± 0.35 | 0.297 |
| Baseline CT findings |  |  |  |  |
| Emphysema | 6 (37.5) | 6 (54.5) | 2 (15.4) | 0.136 |
| Tuberculous-destroyed lung | 4 (25.0) | 0 (0) | 1 (7.7) | 0.133 |
| Bronchiectasis | 10 (62.5) | 5 (45.5) | 8 (61.5) | 0.644 |
| Interstitial lung abnormalities | 9 (56.3) | 4 (36.4) | 5 (38.5) | 0.512 |
| Interstitial lung disease | 1 (6.3) | 1 (9.1) | 1 (7.7) | 0.963 |

Data are presented as *n* (%) or mean ± standard deviation.

*FEV1, FVC, and FEF25–75% are post-bronchodilator values.

CT = computed tomography; DLCO = diffusing capacity of the lungs for carbon monoxide; FEF25–75% = forced expiratory flow between 25% and 75% of vital capacity; FEV1 = forced expiratory volume in 1 s; FVC = forced vital capacity; NTM = nontuberculous mycobacteria

**Table S6.** Annual incidence rates of acute exacerbations and proportions of frequent exacerbators in patients with PRISm according to the longitudinal changes

|  | Persistent  PRISm  (n = 16) | PRISm to  normal (n = 11) | Incident  COPD (n = 13) | P-value |
| --- | --- | --- | --- | --- |
| Annual incidence of acute exacerbations by severity |  |  |  |  |
| Moderate | 0.61 ± 0.80 | 0.35 ± 0.42 | 0.20 ± 0.27 | 0.318 |
| Severe | 0.28 ± 0.43 | 0.04 ± 0.07 | 0.11 ± 0.20 | 0.183 |
| Moderate-to-severe | 0.89 ± 0.99 | 0.38 ± 0.47 | 0.31 ± 0.36 | 0.231 |
| Frequent exacerbator, n (%) | 3 (18.8) | 0 (0) | 0 (0) | 0.093 |

**Table S7.** Annual changes of lung function in patients with PRISm according to the longitudinal changes

|  | No. patients  (n = 40) | Univariable | | Multivariable* | |
| --- | --- | --- | --- | --- | --- |
|  | β ± SE | P-value | β ± SE | P-value |
| ΔFEV1, mL/y |  |  | 0.004 |  | 0.001 |
| Persistent PRISm | 16 | −36.9 ± 14.7 |  | −40.5 ± 10.7 |  |
| PRISm to normal | 11 | 15.1 ± 16.5 |  | 1.3 ± 1.6 |  |
| Incident PRISm | 13 | −13.0 ± 8.7 |  | −14.0 ± 8.5 |  |
| ΔFVC, mL/y |  |  | 0.036 |  | 0.009 |
| Persistent PRISm | 16 | −59.1 ± 20.3 |  | −68.5 ± 17.5 |  |
| PRISm to normal | 11 | −7.7 ± 2.7 |  | −8.1 ± 2.6 |  |
| Incident PRISm | 13 | −5.0 ± 16.8 |  | −9.6 ± 16.6 |  |
| ΔFEV1/FVC |  |  | <0.001 |  | <0.001 |
| Persistent PRISm | 16 | 0.68 ± 0.38 |  | 0.89 ± 0.39 |  |
| PRISm to normal | 11 | 0.27 ± 0.07 |  | 0.27 ± 0.07 |  |
| Incident PRISm | 13 | −0.51 ± 0.25 |  | −0.51 ± 0.25 |  |
| ΔDLCO, mL/mmHg/min/y |  |  | 0.071 |  | 0.034 |
| Persistent PRISm | 16 | −0.64 ± 0.22 |  | −0.60 ± 0.23 |  |
| PRISm to normal | 11 | 0.07 ± 0.28 |  | 0.17 ± 0.38 |  |
| Incident PRISm | 13 | −0.29 ± 0.13 |  | −0.31 ± 0.11 |  |

*Adjusted by age, sex, height, smoking intensity, baseline lung function (FEV1, FVC, or DLCO), and inhaler medication possession ratio.
